# Supplementary material
Source: MDPI journal article supplement (https://www.mdpi.com/2071-1050/13/9/4918)
Supplement: s1 [file s1]

## Supplementary Materials

Table S1: SWOT-Strengths per country

| Strengths    |                 |                         |                             |               |                       |
|--------------|-----------------|-------------------------|-----------------------------|---------------|-----------------------|
| Countries    | ELV legislation | Waste management system | Vehicle registration system | ELV recycling | Vehicle manufacturing |
| Cameroon     | 0.1             | 1                       | 1                           | 0.2           | 0.2                   |
| Kenya        | 0.2             | 1                       | 1                           | 0.3           | 0.5                   |
| Nigeria      | 0.2             | 1                       | 1                           | 0.3           | 0.8                   |
| Egypt        | 0.3             | 1.5                     | 1                           | 0.5           | 1                     |
| India        | 1               | 1.5                     | 1.3                         | 1             | 2                     |
| Malaysia     | 1               | 1.5                     | 1.3                         | 1             | 1.5                   |
| Mexico       | 1               | 1.5                     | 1.3                         | 1             | 2                     |
| South Africa | 1               | 1.5                     | 1.3                         | 1             | 1.5                   |

Table S2: SWOT-Weaknesses per country

| Weaknesses   |                            |                |                              |                        |                        |                          |                                    |                                       |
|--------------|----------------------------|----------------|------------------------------|------------------------|------------------------|--------------------------|------------------------------------|---------------------------------------|
| Countries    | Waste regulatory framework | ELV collection | ELV Recycling infrastructure | Technological capacity | Vehicle deregistration | ELV regulatory framework | Environmental impact and pollution | Unavailability of information on ELVs |
| Cameroon     | 1                          | 0.2            | 0.5                          | 0.5                    | 0.2                    | 0.2                      | 2                                  | 1.8                                   |
| Kenya        | 1                          | 0.2            | 0.6                          | 0.7                    | 0.2                    | 0.3                      | 2                                  | 1.8                                   |
| Nigeria      | 1                          | 0.3            | 0.7                          | 0.9                    | 0.2                    | 0.3                      | 2                                  | 1.8                                   |
| Egypt        | 1.1                        | 0.8            | 0.7                          | 0.9                    | 0.5                    | 0.5                      | 1.8                                | 1.8                                   |
| India        | 1.1                        | 0.9            | 1                            | 1.5                    | 0.5                    | 0.8                      | 1.7                                | 1.5                                   |
| Malaysia     | 1.5                        | 0.9            | 1                            | 1.5                    | 0.5                    | 0.8                      | 1.7                                | 1.5                                   |
| Mexico       | 1.5                        | 0.9            | 1                            | 1.5                    | 0.5                    | 0.8                      | 1.7                                | 1.5                                   |
| South Africa | 1.5                        | 0.9            | 1                            | 1                      | 0.5                    | 0.8                      | 1.7                                | 1.5                                   |

Table S3: SWOT-Opportunities per country

| Opportunities |                   |                        |                 |                 |
|---------------|-------------------|------------------------|-----------------|-----------------|
| Countries     | Large market size | Recyclers of ELV parts | Low labour cost | Informal sector |
| Cameroon      | 1.2               | 0.7                    | 2               | 1.9             |
| Kenya         | 1.4               | 0.8                    | 2               | 1.9             |
| Nigeria       | 1.8               | 1                      | 2               | 1.9             |
| Egypt         | 1.6               | 0.8                    | 2               | 1.9             |
| India         | 2                 | 1.5                    | 1.8             | 2               |
| Malaysia      | 1.3               | 1                      | 1.8             | 1.9             |
| Mexico        | 1.7               | 1                      | 1.8             | 1.9             |
| South Africa  | 1.5               | 1                      | 1.8             | 1.9             |

Table S4: SWOT-Threats per country

| Threats      |                                   |                                  |                              |
|--------------|-----------------------------------|----------------------------------|------------------------------|
| Countries    | Little attention to ELV recycling | Political and social instability | Difficulty of doing business |
| Cameroon     | 1.8                               | 1.8                              | 1.8                          |
| Kenya        | 1.8                               | 1                                | 0.7                          |
| Nigeria      | 1.8                               | 1.8                              | 1.6                          |
| Egypt        | 1.5                               | 0.8                              | 1.4                          |
| India        | 1                                 | 0.5                              | 0.8                          |
| Malaysia     | 1                                 | 0.5                              | 0.2                          |
| Mexico       | 1                                 | 0.8                              | 0.8                          |
| South Africa | 1                                 | 0.5                              | 1                            |
